# Supplementary material for: Ellagitannin-rich cloudberry inhibits hepatocyte growth factor induced cell migration and phosphatidylinositol 3-kinase/AKT activation in colon carcinoma cells and tumors in Min mice
Source: PubMed Central journal article supplement (PMC5190067; doi:10.18632/oncotarget.9724), 2016-05-30
Supplement: oncotarget-07-43907-s001.pdf [file oncotarget-07-43907-s001.pdf]

**SUPPLEMENTARY MOVIES**

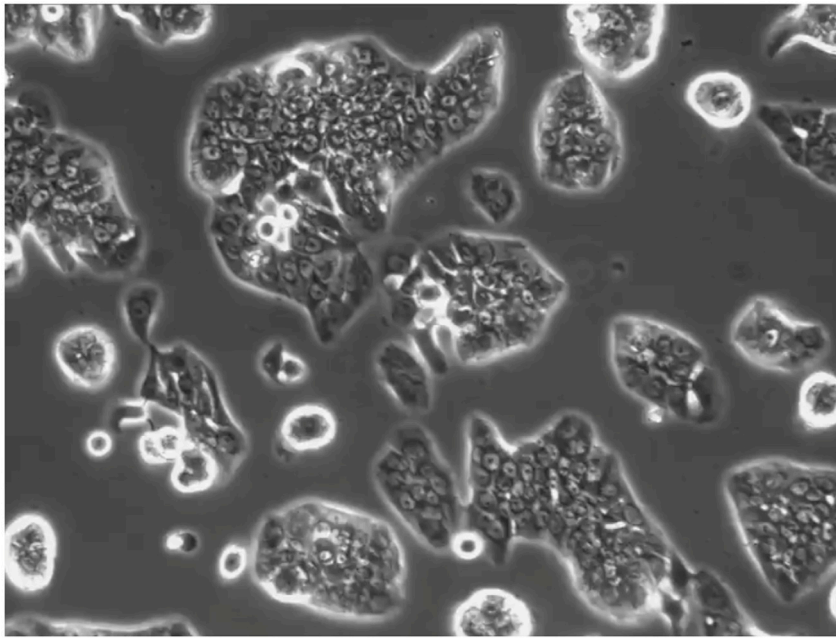

**Supplementary Movie S1: HGF-induced scattering in HT29 cells.**

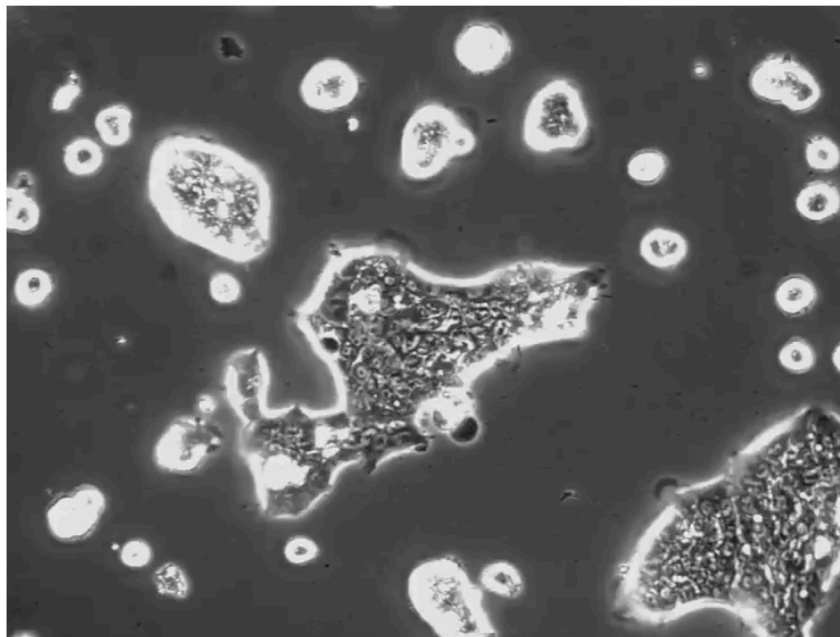

**Supplementary Movie S2: HGF-induced scattering in HCA7 cells.**

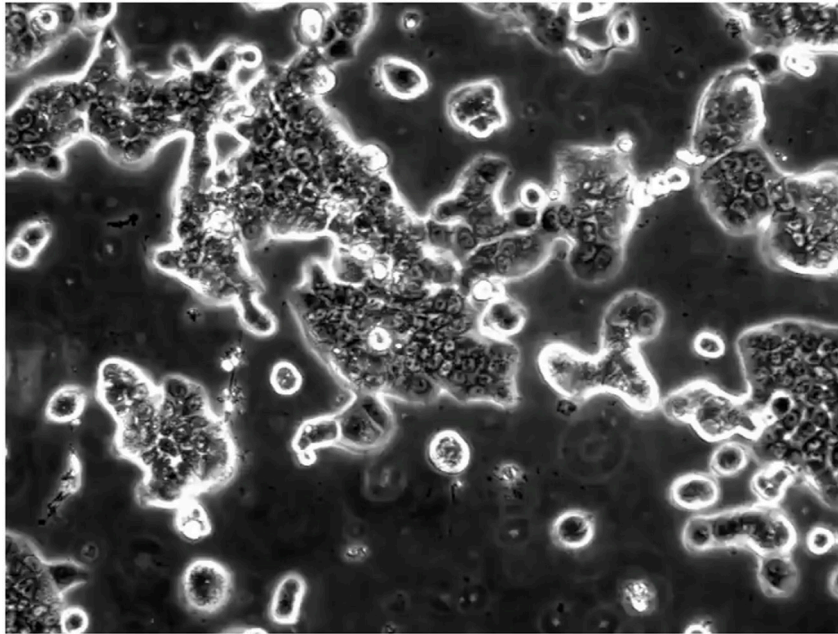

Supplementary Movie S3: HGF-induced scattering in cloudberry treated HT29 cells.

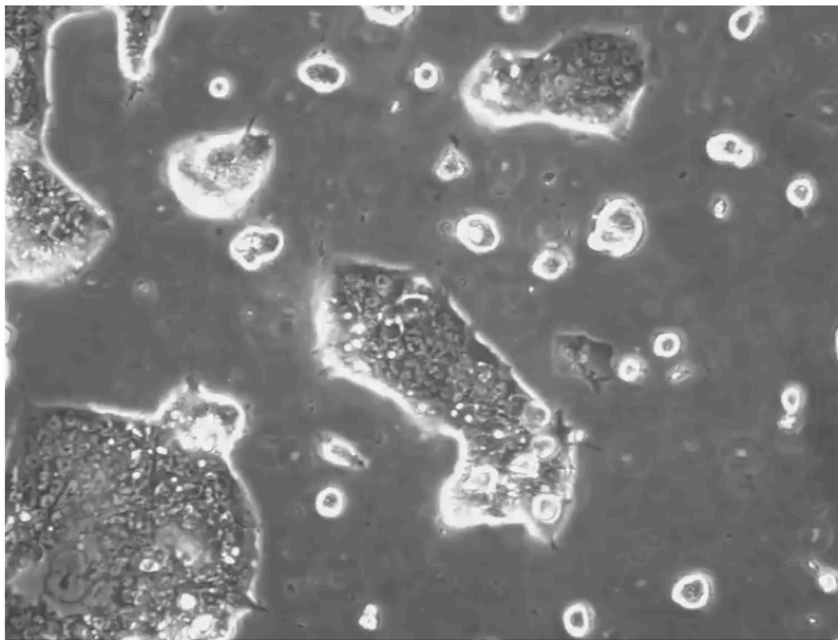

Supplementary Movie S4: HGF-induced scattering in cloudberry treated HCA7 cells.

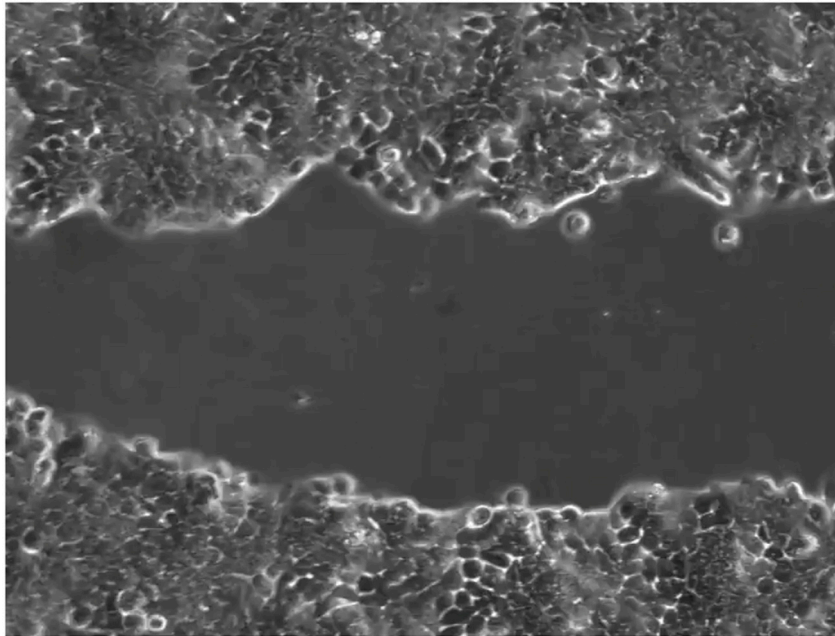

Supplementary Movie S5: HGF-induced scratch wound closure in HT29 cells.

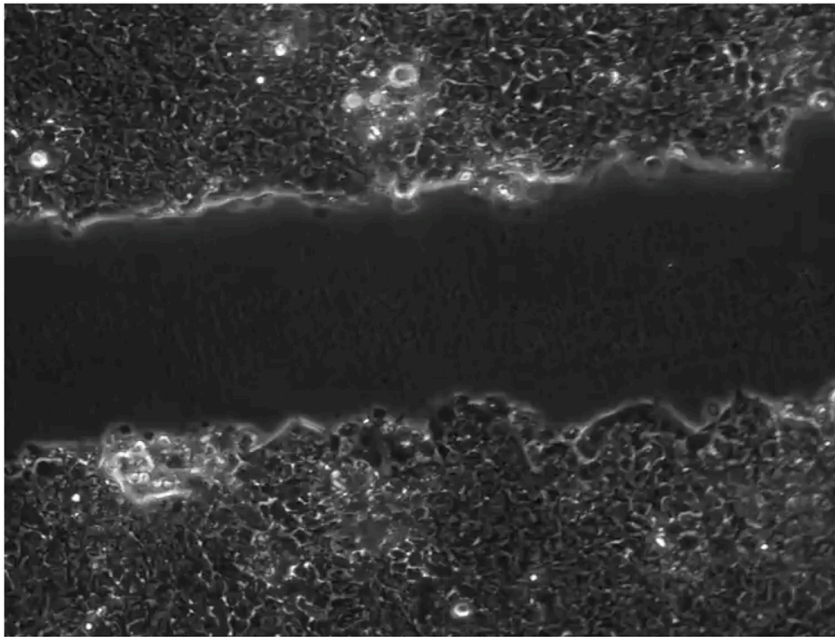

Supplementary Movie S6: HGF-induced scratch wound closure in HCA7 cells.

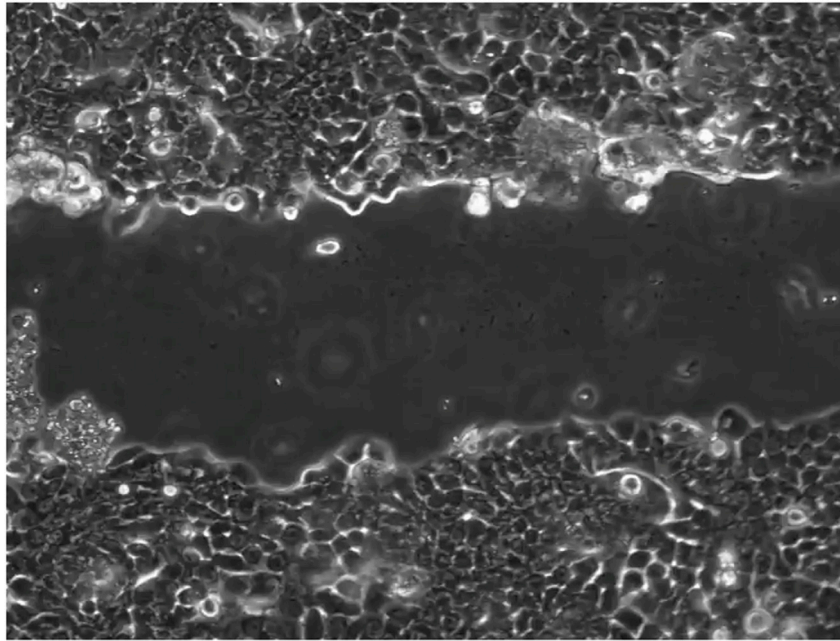

Supplementary Movie S7: HGF-induced scratch wound closure in cloudberry treated HT29 cells.

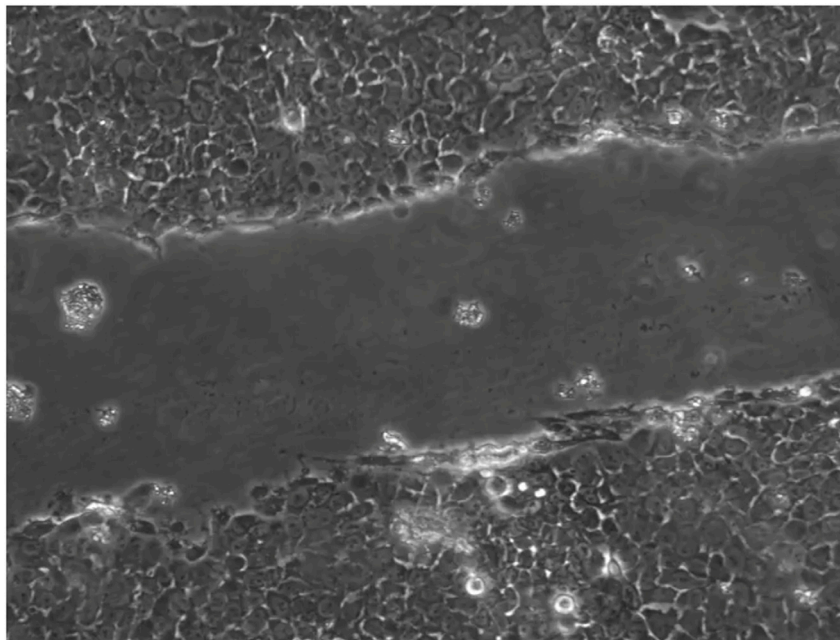

Supplementary Movie S8: HGF-induced scratch wound closure in cloudberry treated HCA7 cells.
